# Supplementary material for: Integrative RNA-Seq and ATAC-Seq Analysis Reveals the Migration-Associated Genes Involved in Antitumor Effects of Herbal Medicine Feiyanning on Lung Cancer Cells
Source: Front Genet. 2021 Dec 21;12:799099. doi: 10.3389/fgene.2021.799099 (PMC8724546; doi:10.3389/fgene.2021.799099)
Supplement: Supplementary file 1 [file Table2.XLSX]

## Sheet: Genes for GO and KEGG analysis
Gene list for GO and KEGG analysis	log2(fold_change)
NPY4R	-22.5312
TVP23C-CDRT4	-14.5151
ATP5J2-PTCD1	-12.0934
MTRNR2L2	-10.3724
LINC01468	-9.10546
MTRNR2L8	-8.79706
KRT83	-8.48468
FAM231D	-8.42163
MTRNR2L9	-8.2412
SPARC	-7.80972
FGG	-7.559
MTRNR2L1	-7.33463
FGB	-7.15847
FN1	-7.12769
COL4A6	-7.02085
HGD	-6.84594
AGMO	-6.825
C8orf4	-6.7102
NUDT4P2	-6.61919
NTS	-6.61016
VIL1	-6.553
MIA2	-6.41696
WDR63	-6.29146
MTRNR2L6	-6.27829
PSG5	-6.1746
NRCAM	-6.04851
C5	-5.99812
ITGA11	-5.9782
HES4	-5.93197
SMARCA5-AS1	-5.88037
CUX2	-5.77853
CRIP1	-5.7135
PSG4	-5.69544
TGFBR1	-5.66586
GPNMB	-5.65979
LUC7L2	-5.65555
ADD3	-5.57333
ABI3BP	-5.53102
SYTL2	-5.4827
MTRNR2L10	-5.46298
ARRDC4	-5.44406
SLC40A1	-5.43439
BAAT	-5.41969
RPL17-C18orf32	-5.40877
TRAM1	-5.36094
C4BPB	-5.3528
ITGA1	-5.28695
UGT1A9	-5.27714
SCNN1B	-5.271
LBH	-5.26613
PLSCR4	-5.25707
PDE3A	-5.2478
IFIH1	-5.24047
COMMD3-BMI1	-5.23463
IGFBP7	-5.21452
MAP2	-5.19539
RND1	-5.17169
FBN2	-5.15862
ANKRD1	-5.14216
CFHR1	-5.14045
EXOC6B	-5.10546
ATL1	-5.09575
LACTB2	-5.05139
CFB	-5.03974
RARB	-4.99775
UGT1A6	-4.93937
MAP7	-4.93744
EPS8L3	-4.90908
NDRG2	-4.90017
CES1	-4.88983
RASSF6	-4.88601
LOC104968399	-4.8792
RRM2B	-4.87065
DAPK2	-4.86171
NPHP3-ACAD11	-4.85511
LOC100996634	-4.85428
FGD4	-4.82168
NBEAL1	-4.79763
NAV2-AS2	-4.79196
TMEM9B-AS1	-4.78194
IP6K3	-4.77902
PLAC8	-4.74943
PAPPA	-4.7367
DEPDC7	-4.70206
SLCO1B1	-4.67519
MOB3B	-4.66514
SLC27A2	-4.64384
GADD45A	-4.61457
COL4A5	-4.6132
TXNIP	-4.60499
DCDC5	-4.60285
USH1C	-4.59758
CDKL5	-4.59547
TM4SF20	-4.58868
C4orf48	-4.58319
EPS8	-4.57548
ABCB1	-4.57434
CCT6B	-4.57317
DNAJB4	-4.57072
PALMD	-4.55903
DLC1	-4.54235
PNPLA4	-4.52644
IQCH-AS1	-4.51622
SGTB	-4.50978
F8	-4.50098
COL5A2	-4.49618
CDH17	-4.48431
HOXC13-AS	-4.47179
RNF19A	-4.45802
ANKRD20A12P	-4.44901
COL4A3	-4.44888
ABCA12	-4.44728
COL4A4	-4.44336
ZBTB26	-4.43256
COLCA2	-4.43137
RGS11	-4.42611
FAM228B	-4.42282
SKIL	-4.41787
HIF1A	-4.41281
RBMS3	-4.41181
PTPRN2	-4.40066
TP53INP1	-4.38781
SPATA18	-4.3815
TTLL6	-4.37308
TRIM73	-4.36857
B4GALT4-AS1	-4.36728
LINC00313	-4.35404
FGA	-4.35305
PRICKLE2	-4.35256
PIEZO2	-4.35036
ACKR3	-4.34728
SLC7A7	-4.33735
NAP1L2	-4.33
VPS13C	-4.32818
POLK	-4.32599
FBN1	-4.32178
ZC2HC1A	-4.31815
LINC00842	-4.2985
HENMT1	-4.28535
ARHGAP44	-4.2664
RGL1	-4.26575
MAOA	-4.26326
MSMP	-4.26199
LOC645513	-4.25682
CYP24A1	-4.25613
ZNF189	-4.25572
USP2	-4.25047
PALLD	-4.24922
SLC3A1	-4.24844
KRCC1	-4.24065
LOC101928525	-4.22354
RHOD	-4.2165
INPP5D	-4.19981
ITGAV	-4.19388
CFAP126	-4.17514
FAM214A	-4.16987
LRRK2	-4.1624
B4GALT1-AS1	-4.16053
ZNF420	-4.1534
ANKRD30A	-4.15256
GPRIN3	-4.14899
HORMAD1	-4.14527
PCDHA12	-4.13354
PGM2L1	-4.12267
C2orf27A	-4.1135
P4HA3	-4.10917
C2orf82	-4.10591
PCDHAC1	-4.09902
TEAD1	-4.09438
VPS13A	-4.09263
TMEM45A	-4.09066
C8orf46	-4.08732
PWAR5	-4.08358
SLMO2-ATP5E	-4.08106
KRT19	-4.07967
KRT222	-4.07758
FLRT3	-4.07136
GLS	-4.06041
TNS1	-4.05566
ENTPD2	-4.05375
SLC23A1	-4.04675
TTLL11	-4.0431
NCOA2	-4.03217
TGFB2	-4.03155
ANKRA2	-4.02849
SCG2	-4.01974
ADGRG6	-4.01954
C16orf87	-4.01944
GFRA1	-4.01827
ANXA9	-4.01635
BMPR2	-4.00851
VGLL3	-4.00241
